# Supplementary material for: Festuca pratensis-like Subgenome Reassembly from a “Chromosomal Cocktail” in the Intergeneric Festulolium (Poaceae) Hybrid: A Rare Chromoanagenesis Event in Grasses
Source: MDPI journal article supplement (doi:10.3390/plants12050984), 2023-02-21

Figure S3. Extended view of the GISH/FISH metaphase image (corresponds to Fig. 4 a,b) specifying the patterns of detached “floating” 45S rDNAs in and along metaphase plate of F2 3-18 donor plant; numerous detached 45S rDNAs are arrowed in b. Scale bar = 10  $\mu$ m.

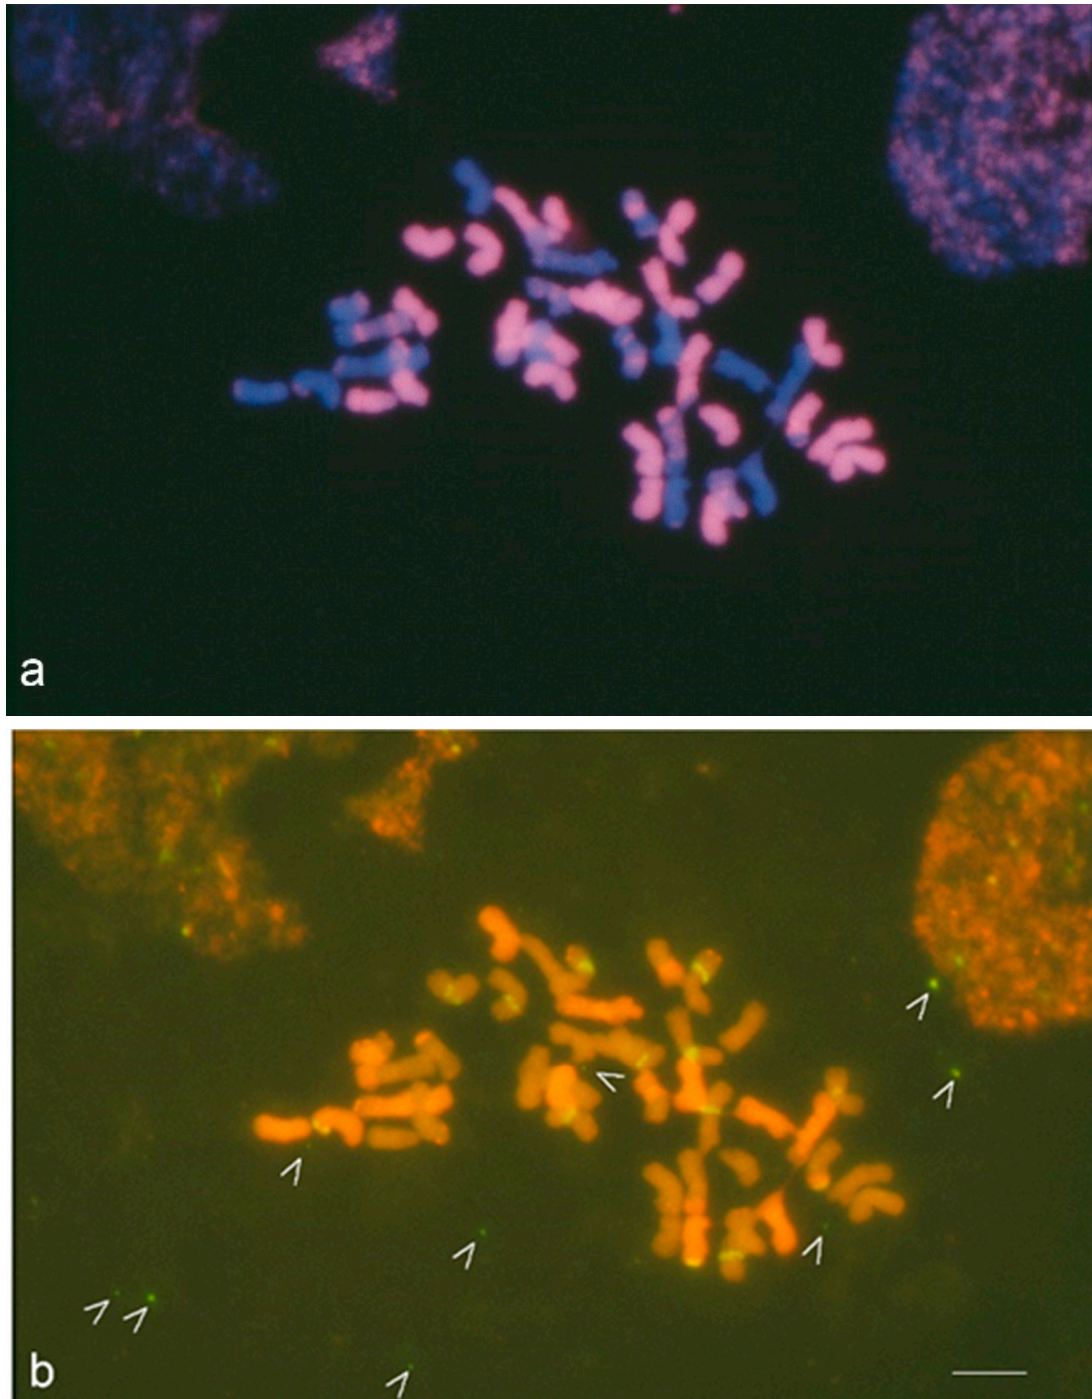

Supplement: s1 [file s1]
