# Supplementary material for: Festuca pratensis-like Subgenome Reassembly from a “Chromosomal Cocktail” in the Intergeneric Festulolium (Poaceae) Hybrid: A Rare Chromoanagenesis Event in Grasses
Source: MDPI journal article supplement (doi:10.3390/plants12050984), 2023-02-21

Figure S1. Meiosis patterns of F2 3-18 plant. (a,b) Chromosome pairing structures in MI with the multivalents of variable sizes and irregular shapes prevalent; (c,d) micronuclei, cytomixis, stickiness and chromatin bridges in tetrads. Scale bars 10 and 60  $\mu\text{m}$ , in a and c respectively.

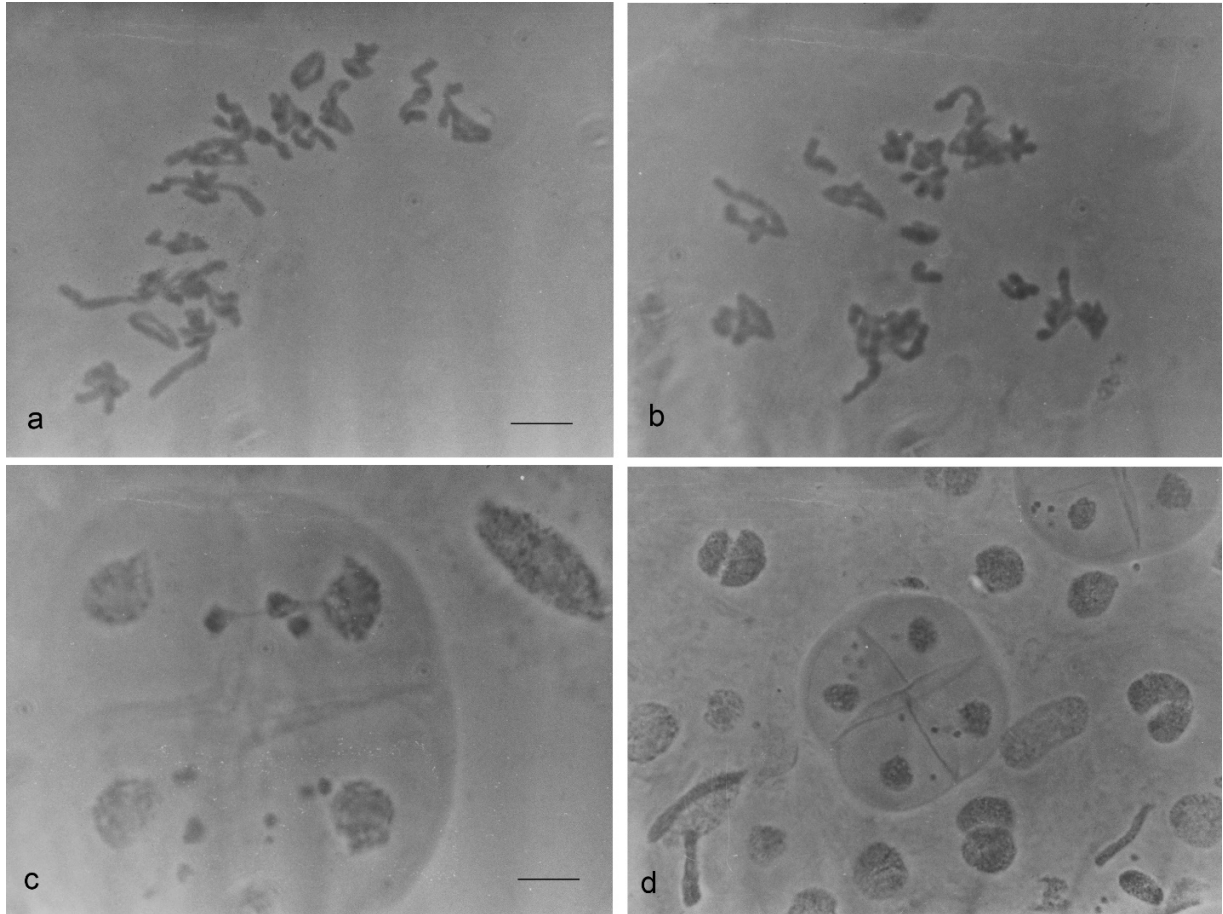

Supplement: s1 [file s1]
